# Supplementary material for: Sequence analysis and mRNA expression of prolactin receptor gene isoforms in different tissues of sheep during lactation and the post-weaning period
Source: PeerJ. 2021 Jul 29;9:e11868. doi: 10.7717/peerj.11868 (PMC8325911; doi:10.7717/peerj.11868)
Supplement: Supplemental Information 1 — 2−ΔΔCt values of L-PRLR and S-PRLR in uterus, mammary gland, ovary, lymph and spleen of sheep during lactation and post-weaning period. Each group had 5 replicates [file peerj-09-11868-s001.xlsx]

## Sheet: Sheet1
2^-△△Ct of L-PRLR
L-PRLR	Lactation					Post-weaning period
uterus	0.69	3.36	9.32	0.51	0.16	1.7	2.4	1.3	0.06	0.03
ovary	0.35	0.03	0.16	0.02	0.26	0.15	0.5	0.56	0.01
mammary	0.52	0.07	0.35	0.01	0.02	1	0.52	1.09	0.04	0.66
spleen	0.15	0.44	0.23	0.33	0.5	0.17	0.51	0.39	0.06	0.28
lymph	0.6	0.8	0.8	0.7	0.6	0.18	0.15	0.13	0.16	0.18

## Sheet: Sheet2
2^-△△Ct of S-PRLR
S-PRLR	Lactation					Post-weaning period
uterus	0.19	0.17	0.17	0.2	0.2	1.75	2.33	0.88	0.15	0.06
ovary	0.02	0.02	0.02	0.02	0.03	0.03	0.01	0.01	0.02	0.04
mammary	0.03	0.05	0.03	0.04	0.04	0.11	0.19	0.11	0.21	0.16
spleen	0.1	0.11	0.08	0.03	0.06	0.08	0.17	0.05	0.14	0.25
lymph	0.07	0.07	0.07	0.07	0.08	0.36	0.31	0.23	0.06	0.08
